# Supplementary material for: Subcutaneous cardioverter defibrillator has longer time to therapy but is less cardiotoxic than transvenous cardioverter defibrillator. Study carried out in a preclinical porcine model
Source: Oxford University Press journal article supplement (doi:10.1093/europace/eux074), 2017-04-27
Supplement: eux074_sup_file_1_systemic.hemodynamic.xls [file eux074_sup_file_1_systemic.hemodynamic.xls]

## Sheet: Sheet1
	T-ICD group n=7		S-ICD group n=7		p
Creatinine (µmol/L)
Baseline	76	[69; 90]	79	[77; 95]	0.259
1 hour after procedure	81	[76; 91]	82	[73; 96]	1
3 hours after procedure	79	[75; 93]	88	[77; 102]	0.318
6 hours after procedure	85	[76; 94]	87	[79; 106]	0.318
24 hours after procedure	74	[69; 87]	82	[68; 95]	0.805
2 days after procedure	74	[72; 82]	82	[76; 96]	0.209
3 days after procedure	80	[70; 89]	94	[77; 101]	0.456
4 days after procedure	82	[72; 95]	95	[80; 98]	0.259
5 days after procedure	89	[70; 93]	88	[73; 99]	0.535
Lactate (mmol/L)
Baseline	1	[0.9; 1.2]	1.1	[0.9; 1.3]	0.9
1 hour after procedure	1.6	[1.1; 1.7]	1.1	[1; 1.3]	0.1
3 hours after procedure	1.4	[1.1; 1.7]	1.6	[1.3; 1.8]	0.4
6 hours after procedure	0.8	[0.7; 0.9]	0.8	[0.6; 0.8]	0.4
24 hours after procedure	0.8	[0.7; 1.3]	0.8	[0.6; 1.1]	0.5
2 days after procedure	1.1	[0.9; 1.9]	1.6	[0.7; 1.9]	0.8
3 days after procedure	1.3	[0.8; 2]	1.4	[1; 1.6]	1
4 days after procedure	1.1	[0.8; 1.5]	1.3	[1.1; 1.7]	0.2
5 days after procedure	1.2	[0.7; 2.1]	1.2	[1; 1.6]	0.9
TGO (UI/L)
Baseline	19	[15; 24]	16	[14; 22]	0.6
1 hour after procedure	31	[27; 39]	35	[34; 37]	0.3
3 hours after procedure	30	[28; 51]	69	[57; 81]	0.001
6 hours after procedure	32	[22; 55]	94	[66; 125]	0.004
24 hours after procedure	28	[17; 49]	56	[47; 73]	0.017
2 days after procedure	19	[15; 22]	27	[24; 34]	0.038
3 days after procedure	15	[14; 21]	19	[16; 21]	0.3
4 days after procedure	20	[13; 23]	20	[20; 22]	0.8
5 days after procedure	18	[17; 20]	20	[16; 23]	0.5
TGP (UI/L)
Baseline	21	[14; 35]	21	[20; 24]	1
1 hour after procedure	25	[19; 37]	22	[21; 25]	0.8
3 hours after procedure	24	[21; 38]	27	[24; 29]	0.9
6 hours after procedure	25	[21; 38]	31	[25; 33]	0.5
24 hours after procedure	27	[23; 37]	33	[30; 42]	0.3
2 days after procedure	28	[23; 36]	33	[31; 44]	0.3
3 days after procedure	26	[22; 32]	28	[26; 40]	0.4
4 days after procedure	25	[22; 34]	26	[26; 36]	0.4
5 days after procedure	27	[24; 36]	27	[25; 32]	0.7
Bicarbonates (mmol/L)
Baseline	27	[25; 29]	27	[26; 29]	0.7
1 hour after procedure	26	[24; 27]	25	[25; 28]	0.8
3 hours after procedure	25	[24; 28]	25	[24; 26]	0.6
6 hours after procedure	27	[25; 28]	26	[25; 27]	0.4
24 hours after procedure	28	[25; 28]	26	[25; 27]	0.7
2 days after procedure	27	[26; 28]	26	[25; 27]	0.1
3 days after procedure	29	[27; 30]	28	[25; 30]	0.5
4 days after procedure	30	[28; 32]	29	[28; 30]	0.3
5 days after procedure	29	[28; 32]	29	[27; 30]	0.6
Data are expressed as median [25th quartile;75th quartile]. T-ICD = transvenous implantable cardioverter defibrillator; S-ICD = subcutaneous implantable cardioverter defibrillator; VF = ventricular fibrillation.
