# Supplementary material for: Subcutaneous cardioverter defibrillator has longer time to therapy but is less cardiotoxic than transvenous cardioverter defibrillator. Study carried out in a preclinical porcine model
Source: Oxford University Press journal article supplement (doi:10.1093/europace/eux074), 2017-04-27
Supplement: eux074_sup_file_2_neuro.xls [file eux074_sup_file_2_neuro.xls]

## Sheet: Sheet1
	T-ICD group n=7		S-ICD group n=7		p
Total power 1
before 1st VF induction	0.05	[0.01; 0.37]	0.03	[0.02; 0.04]	0.5
after 1st VF induction	0.01	[0.01; 0.06]	0.02	[0.01; 0.02]	0.8
after 2d VF induction	0.01	[0.01; 0.35]	0.01	[0.01; 0.03]	0.4
after 3rd VF induction	0.03	[0.02; 0.13]	0.03	[0.02; 0.05]	0.9
after 4th VF induction	0.02	[0.01; 0.09]	0.03	[0.02; 0.03]	0.9
after 5th VF induction	0.07	[0.02; 0.83]	0.02	[0.01; 0.04]	0.2
Total power 2
before 1st VF induction	0.04	[0.02; 0.7]	0.04	[0;03; 0.11]	0.5
after 1st VF induction	0.04	[0.02; 0.08]	0.02	[0.01; 0.03]	0.4
after 2d VF induction	0.03	[0.02; 0.05]	0.03	[0.02; 0.03]	0.6
after 3rd VF induction	0.04	[0.02; 0.11]	0.03	[0.03; 0.05]	0.6
after 4th VF induction	0.03	[0.02; 0.06]	0.02	[0.02; 0.04]	1
after 5th VF induction	0.03	[0.03; 0.17]	0.03	[0.03; 0.04]	0.5
Spectral edge frequency 1
before 1st VF induction	9	[5.9; 11.5]	9.8	[8.1; 10.8]	0.71
after 1st VF induction	9	[6.9; 12.1]	11.3	[7.9; 12.6]	0.805
after 2d VF induction	7.8	[6.5; 12.8]	10.8	[10.4; 12.5]	0.535
after 3rd VF induction	7	[6.7; 13.6]	8.8	[6.8; 9.6]	0.62
after 4th VF induction	9.8	[6; 13.5]	10	[9.4; 10.8]	0.383
after 5th VF induction	9.5	[7.6; 17.5]	9.3	[8; 10.4]	0.456
Spectral edge frequency 2
before 1st VF induction	9.8	[8; 10.3]	10.3	[8.5; 12.8]	0.1
after 1st VF induction	9.8	[8.8; 11.6]	10	[7.6; 11.3]	0.6
after 2d VF induction	10.3	[8.9; 12]	10.5	[9.5; 11.5]	0.9
after 3rd VF induction	11	[8.9; 13.5]	10.5	[9.1; 14.1]	0.9
after 4th VF induction	9.8	[8.8; 11.6]	11.3	[7.5; 12.6]	0.6
after 5th VF induction	10.3	[8.6; 11.6]	9.8	[8.4; 12.1]	0.8
Data are expressed as median [25th quartile;75th quartile]. T-ICD = transvenous implantable cardioverter defibrillator; S-ICD = subcutaneous implantable cardioverter defibrillator; VF = ventricular fibrillation.
